# Supplementary material for: Evolution of DIMBOA-Glc O-Methyltransferases from Flavonoid O-Methyltransferases in the Grasses
Source: MDPI journal article supplement (doi:10.3390/molecules27031007), 2022-02-02
Supplement: s1 [file s1]

**Table S1.** Enzymatic activity of Poaceae OMTs in the *FOMT2*-like group with different substrates. Data belong to the experiment shown in Figure 2 and Figure S2 (panel b and c). The purified recombinant enzymes as well as an empty vector control (EV) were incubated with the potential substrates listed in presence of the cosubstrate SAM. Reaction products were analyzed by LC-MS/MS. Product formation is given as mean area  $\pm$  SE ( $n = 3$ ). Numbers in grey are considered as trace activities, because they represent product formation rates less than 1% relative to the most active enzyme, which is either ZmBX12 or ZmFOMT2. Abbreviations: Me, methyl; nd, not detected.

| Substrate         | Analyte                  | Mean area $\pm$ SE |                      |                      |                      |                      |                      |         |                      |                      |             |
|-------------------|--------------------------|--------------------|----------------------|----------------------|----------------------|----------------------|----------------------|---------|----------------------|----------------------|-------------|
|                   |                          | EV                 | ShFOMT2              | SbFOMT2              | ZmFOMT2              | ZmBX14               | ZmBX12               | ZnGBZQ  | ZnBX10               | Pvag9400             | Pv2300-like |
| DIMBOA-Glc        | HDMBOA-Glc               | nd                 | nd                   | nd                   | nd                   | 2.3E+04              | 1.8E+05              | nd      | 4.1E+04              | nd                   | nd          |
|                   |                          | -                  | -                    | -                    | -                    | $\pm 7.6\text{E}+02$ | $\pm 8.7\text{E}+03$ | -       | $\pm 2.2\text{E}+03$ | -                    | -           |
| Naringenin        | 5-O-Me-Naringenin        | nd                 | 1.9E+06              | 1.1E+07              | 6.5E+07              | 5.5E+03              | 3.9E+04              | 8.3E+03 | 4.3E+03              | 3.4E+04              | nd          |
|                   |                          | -                  | $\pm 5.6\text{E}+04$ | $\pm 2.1\text{E}+05$ | $\pm 1.0\text{E}+06$ | 1.0E+03              | $\pm 2.7\text{E}+02$ | 4.6E+02 | 4.6E+02              | $\pm 2.8\text{E}+03$ | -           |
| 2-OH-Naringenin   | O-Me-2-OH-Naringenin_P1  | nd                 | 7.9E+05              | 8.6E+06              | 1.1E+07              | nd                   | nd                   | nd      | nd                   | 3.1E+03              | -           |
|                   |                          | -                  | $\pm 1.5\text{E}+04$ | $\pm 1.8\text{E}+05$ | $\pm 2.8\text{E}+05$ | -                    | -                    | -       | -                    | $\pm 4.4\text{E}+02$ | -           |
|                   | O-Me-2-OH-Naringenin_P2  | nd                 | 3.9E+04              | 5.1E+05              | 6.5E+05              | nd                   | nd                   | nd      | nd                   | nd                   | -           |
|                   |                          | -                  | $\pm 1.2\text{E}+03$ | $\pm 3.4\text{E}+04$ | $\pm 3.6\text{E}+03$ | -                    | -                    | -       | -                    | -                    | -           |
|                   | Xilonenin (keto)         | nd                 | nd                   | 4.3E+05              | 1.7E+06              | nd                   | nd                   | nd      | nd                   | nd                   | -           |
|                   |                          | -                  | -                    | $\pm 2.7\text{E}+04$ | $\pm 1.1\text{E}+05$ | -                    | -                    | -       | -                    | -                    | -           |
|                   | Xilonenin (enol)         | nd                 | nd                   | 1.1E+06              | 4.6E+06              | nd                   | nd                   | nd      | nd                   | nd                   | -           |
|                   |                          | -                  | -                    | $\pm 2.8\text{E}+04$ | $\pm 1.3\text{E}+05$ | -                    | -                    | -       | -                    | -                    | -           |
| Apigenin          | 5-O-Me-Apigenin          | nd                 | 1.1E+06              | 4.2E+06              | 5.2E+07              | nd                   | 1.5E+05              | nd      | nd                   | 1.5E+05              | -           |
|                   |                          | -                  | $\pm 1.5\text{E}+04$ | $\pm 3.3\text{E}+05$ | $\pm 3.8\text{E}+05$ | -                    | $\pm 1.3\text{E}+02$ | -       | -                    | $\pm 2.6\text{E}+03$ | -           |
| Scutellarein      | 5-O-Me-Scutellarein      | nd                 | 4.8E+05              | 3.2E+06              | 1.9E+07              | 1.3E+04              | 1.8E+04              | nd      | nd                   | 8.7E+03              | nd          |
|                   |                          | -                  | $\pm 8.3\text{E}+03$ | $\pm 2.8\text{E}+04$ | $\pm 6.2\text{E}+04$ | $\pm 3.3\text{E}+03$ | $\pm 2.0\text{E}+02$ | -       | -                    | $\pm 9.8\text{E}+02$ | -           |
| Dihydrokaempferol | 5-O-Me-Dihydrokaempferol | nd                 | 2.6E+04              | 3.2E+05              | 2.7E+06              | nd                   | nd                   | nd      | nd                   | nd                   | -           |
|                   |                          | -                  | $\pm 7.5\text{E}+02$ | $\pm 8.5\text{E}+02$ | $\pm 7.4\text{E}+04$ | -                    | -                    | -       | -                    | -                    | -           |
| Kaempferol        | 5-O-Me-Kaempferol        | nd                 | 7.2E+05              | 4.1E+06              | 4.3E+07              | 6.0E+04              | 2.0E+04              | nd      | nd                   | 2.1E+04              | nd          |
|                   |                          | -                  | $\pm 3.8\text{E}+04$ | $\pm 7.6\text{E}+04$ | $\pm 5.9\text{E}+05$ | $\pm 2.0\text{E}+04$ | $\pm 3.0\text{E}+02$ | -       | -                    | $\pm 3.3\text{E}+03$ | -           |
|                   | Isokaempferide           | nd                 | nd                   | 9.8E+04              | 1.7E+04              | nd                   | 5.8E+06              | nd      | 3.9E+05              | nd                   | nd          |
|                   |                          | -                  | -                    | $\pm 2.3\text{E}+03$ | $\pm 2.5\text{E}+03$ | -                    | $\pm 6.6\text{E}+04$ | -       | $\pm 1.1\text{E}+04$ | -                    | -           |
| Quercetin         | 5-O-Me-Quercetin         | nd                 | 3.9E+05              | 1.1E+05              | 3.6E+07              | 4.6E+04              | nd                   | nd      | nd                   | 6.9E+03              | -           |
|                   |                          | -                  | $\pm 2.3\text{E}+04$ | $\pm 5.3\text{E}+03$ | $\pm 9.2\text{E}+05$ | $\pm 2.0\text{E}+04$ | -                    | -       | -                    | $\pm 7.1\text{E}+02$ | -           |

**Table S2.** Resulting binding modes for docking of naringenin into the homology model of ZmFOMT2 using AutoDock Vina (<http://vina.scripps.edu/>; Trott and Olson, 2010) with the grid box (size x/y/z = 26 Å) centered on His271 (C-2) base of the catalytic triad and with the exhaustiveness set to 8. The binding mode displayed in Figures 3a and 3b is highlighted in grey.

| Mode # | Binding affinity (kcal/mol) | Distance from best mode (RMSD lower bound) | Distance from best mode (RMSD upper bound) |
|--------|-----------------------------|--------------------------------------------|--------------------------------------------|
| 1      | -7.0                        | 0.000                                      | 0.000                                      |
| 2      | -6.5                        | 6.297                                      | 9.188                                      |
| 3      | -6.5                        | 3.298                                      | 8.730                                      |
| 4      | -6.5                        | 1.240                                      | 2.743                                      |
| 5      | -6.4                        | 2.578                                      | 8.358                                      |
| 6      | -6.3                        | 3.695                                      | 6.598                                      |
| 7      | -6.3                        | 6.088                                      | 9.199                                      |
| 8      | -6.2                        | 2.337                                      | 3.544                                      |
| 9      | -6.2                        | 3.132                                      | 5.571                                      |

**Table S3.** Other possible mutation sites. Listed are amino acid residues that differ between most, but not all, functional ZmFOMT2-like FOMTs and BX OMTs. The residues are also not restricted to the putative active site. Amino acids present in ZmFOMT2 and ZmBX10 are highlighted in bold.

| Alignment position<br>(Figure S5) | ZmFOMT2<br>sequence position | Amino acid in FOMTs<br>(ZmFOMT2/3 / SbFOMT2 / ShFOMT2) | Amino acid in BX OMTs<br>(ZmBX10/11/12 / ZnBX10) |
|-----------------------------------|------------------------------|--------------------------------------------------------|--------------------------------------------------|
| 175                               | 130                          | <b>H</b>                                               | <b>Q</b>                                         |
| 179                               | 134                          | <b>V</b> / Q                                           | <b>A</b>                                         |
| 265                               | 199                          | <b>V</b>                                               | T / <b>M</b>                                     |
| 338                               | 268                          | <b>T</b>                                               | <b>K</b>                                         |
| 381                               | 308                          | <b>G</b> / D                                           | <b>K</b>                                         |
| 396                               | 315                          | <b>L</b>                                               | <b>Q</b>                                         |
| 444                               | /                            | -                                                      | <b>I</b>                                         |

**Table S4.** PCR primers for the amplification of full-length ORFs of investigated OMTs and for site-directed mutagenesis.

| Primer name                                                                                                                                                                                                                                                            | Target gene<br>(GenBank accession) | Primer Sequence (5' → 3')                                                                                                                                                                                                                                                                                                                                                                                                                                                                                                                                                  | Restriction<br>recognition<br>site / mutation                                                                    | Application                  |
|------------------------------------------------------------------------------------------------------------------------------------------------------------------------------------------------------------------------------------------------------------------------|------------------------------------|----------------------------------------------------------------------------------------------------------------------------------------------------------------------------------------------------------------------------------------------------------------------------------------------------------------------------------------------------------------------------------------------------------------------------------------------------------------------------------------------------------------------------------------------------------------------------|------------------------------------------------------------------------------------------------------------------|------------------------------|
| Sb-001G354400-F<br>Sb-001G354400-R                                                                                                                                                                                                                                     | <i>Sb001G354400</i>                | CACCATGGCACCCGCGGAGGAGAG<br>TCATGGATAGACCTCGATGAC                                                                                                                                                                                                                                                                                                                                                                                                                                                                                                                          |                                                                                                                  | TOPO<br>cloning              |
| Pv-9NG562300-IBA-F<br>Pv-9NG562300-IBA-R                                                                                                                                                                                                                               | <i>Pvir9NG562300</i>               | ATGGTAGGTCTCAGCGCATGGCATCATCGCTCCCTG<br>ATGGTAGGTCTCATATCAAGGGTAGAGTTTCGATGATTGACAT                                                                                                                                                                                                                                                                                                                                                                                                                                                                                        | <i>BsaI</i>                                                                                                      | pASK-IBA37plus<br>cloning    |
| Fomt2-Mut8+9-F2<br>Fomt2-Mut8+9-R2<br>Fomt2-W22-Mut3-F<br>Fomt2-W22-Mut3-R<br>Fomt2-W22-Mut1+2-F2<br>Fomt2-W22-Mut1+2-R2<br>Fomt2-W22-Mut4+5-F2<br>Fomt2-W22-Mut4+5-R2<br>Fomt2-W22-Mut1+2+6-F<br>Fomt2-W22-Mut1+2+6-R<br>Fomt2-W22-Mut4+5+7-F<br>Fomt2-W22-Mut4+5+7-R | <i>ZmFOMT2</i><br>(MZ484743)       | CGACCTCTTGACCAATCCCTGTGCTACGCCAAATCGCTC<br>CACAGGGAATGGTGCAAGAGGTGCGACGTGAGCTTCGAGC<br>GGTAATAATCTTGGACGTGGTAGTTGGATATGG<br>CCATATCCAACCTACCACGTCCAAGATTATTACC<br>GTTATGTTTGATTTGTATATGATGGCGGTTAATGGAGCTGAGCGC<br>GCGCTCAGCTCCATTAACCGCCATCATATACAAATCAAACATAAC<br>CAAAATCCTACCAATCCTTGGTGACGTATCAGTCATCGAGGTCTATCC<br>GGATAGACCTCGATGACTGATACGTCACCAAGGATTGGTAGGATTTTG<br>GTATATGATGGCGGTTAATGGAGTTGAGCGCGACGAGCAAGAGTGG<br>CCACTCTTGCTCGTCGCGCTCAACTCCATTAACCGCCATCATATAC<br>GACTACAAAATCCTACCAATCATTGGTGACGTATCAGTCATCG<br>CGATGACTGATACGTCACCAATGATTGGTAGGATTTTGTAGTC | W16L + Q18H<br><br>M303V<br><br>I325M + T327A<br>A358D + L359V<br>I325M + T327A + A331V<br>A358D + L359V + L356I | site-directed<br>mutagenesis |

**Table S5.** MS settings used for the analysis on the QTRAP 6500+.

| <b>Turbospray ESI ion source settings</b> |                   |                       |
|-------------------------------------------|-------------------|-----------------------|
| <b>Analytes</b>                           | <b>flavonoids</b> | <b>benzoxazinoids</b> |
| Ionization mode:                          | positive          | negative              |
| Ion spray voltage:                        | +5500 V           | -4500 V               |
| Turbo gas temperature:                    | 650°C             | 650°C                 |
| Curtain gas:                              | 40 psi            | 40 psi                |
| Collision gas:                            | medium level      | medium level          |
| Nebulizer gas:                            | 60 psi            | 70 psi                |
| Heating gas:                              | 60 psi            | 70 psi                |

**Table S6.** Mass analyzer settings used for the analysis of BXs and flavonoids on the QTRAP 6500+. Retention time (RT) was used to distinguish between compounds with the same MRM transition. Compounds marked with (\*) were verified by an authentic standard, while the remaining O-methylflavonoids were inferred from the specific ZmFOMT2 enzymatic activity as described previously in Förster et al. (2021). Abbreviations: Me, methyl; DP, declustering potential; EP, entrance potential; CE, collision energy; CXP, collision cell exit potential; V, volts.

| Compound                                        | RT (min) | MRM transition <i>m/z</i>       | DP (V) | EP (V) | CE (V) | CXP (V) |
|-------------------------------------------------|----------|---------------------------------|--------|--------|--------|---------|
| <b>Benzoxazinoids (negative mode)</b>           |          |                                 |        |        |        |         |
| DIMBOA-Glc*                                     | 4.35     | 372 [M-H] <sup>-</sup> → 210    | -40    | -4     | -15    | -4      |
| HDMBOA-Glc*                                     | 5.16     | 432 [M+FA-H] <sup>-</sup> → 356 | -40    | -4     | -20    | -3      |
| <b>Flavonoids (positive mode)</b>               |          |                                 |        |        |        |         |
| Apigenin*                                       | 6.59     | 271 [M+H] <sup>+</sup> → 153    | 50     | 3.5    | 41     | 4       |
| Naringenin*                                     | 6.64     | 273 [M+H] <sup>+</sup> → 153    | 41     | 4.5    | 31     | 4       |
| 5-O-Me-Apigenin*                                | 4.94     | 285 [M+H] <sup>+</sup> → 270    | 50     | 6      | 31     | 8       |
| 5-O-Me-Naringenin*                              | 4.98     | 287 [M+H] <sup>+</sup> → 167    | 36     | 5      | 31     | 6       |
| Scutellarein*                                   | 5.32     | 287 [M+H] <sup>+</sup> → 123    | 50     | 3.5    | 47     | 4       |
| Kaempferol*                                     | 6.80     | 287 [M+H] <sup>+</sup> → 153    | 50     | 2      | 39     | 4       |
| Dihydrokaempferol*                              | 5.11     | 289 [M+H] <sup>+</sup> → 243    | 50     | 4      | 15     | 6       |
| 2-Hydroxynaringenin*                            | 5.52     | 289 [M+H] <sup>+</sup> → 121    | 21     | 5      | 21     | 14      |
| 5-O-Me-Scutellarein*                            | 4.67     | 301 [M+H] <sup>+</sup> → 286    | 50     | 3      | 33     | 6       |
| 5-O-Me-Kaempferol                               | 5.50     | 301 [M+H] <sup>+</sup> → 286    | 50     | 2      | 35     | 6       |
| 3-O-Me-Kaempferol (Isokaempferide)*             | 7.03     | 301 [M+H] <sup>+</sup> → 286    | 50     | 4      | 27     | 8       |
| 5-O-Me-Dihydrokaempferol                        | 4.40     | 303 [M+H] <sup>+</sup> → 107    | 50     | 4      | 55     | 2       |
| Quercetin*                                      | 5.93     | 303 [M+H] <sup>+</sup> → 153    | 50     | 7      | 45     | 4       |
| O-Me-2-Hydroxynaringenin (peak 1)               | 6.41     | 303 [M+H] <sup>+</sup> → 167    | 21     | 5      | 21     | 20      |
| O-Me-2-Hydroxynaringenin (peak 2)               | 8.29     | 303 [M+H] <sup>+</sup> → 167    | 21     | 5      | 21     | 20      |
| 5-O-Me-Quercetin                                | 4.78     | 317 [M+H] <sup>+</sup> → 302    | 50     | 7      | 35     | 6       |
| O-DiMe-2-Hydroxynaringenin (Xilonenin; peak 1)* | 5.48     | 317 [M+H] <sup>+</sup> → 181    | 1      | 5      | 21     | 20      |
| O-DiMe-2-Hydroxynaringenin (Xilonenin; peak 2)* | 6.78     | 317 [M+H] <sup>+</sup> → 181    | 1      | 5      | 21     | 20      |

**Table S7.** Phytozome 13 (<https://phytozome-next.jgi.doe.gov/>) data sets used and corresponding references for the phylogenetic analysis shown in Figure 1 and Figure S1.

| Plant species                  | Data set version | Reference                                                                                                                              |
|--------------------------------|------------------|----------------------------------------------------------------------------------------------------------------------------------------|
| <i>Brachipodium distachyon</i> | 3.1              | <a href="https://phytozome-next.jgi.doe.gov/info/Bdistachyon_v3_1">https://phytozome-next.jgi.doe.gov/info/Bdistachyon_v3_1</a>        |
| <i>Brachipodium stacei</i>     | 1.1              | Gordon et al., 2020                                                                                                                    |
| <i>Eleusine coracana</i>       | 1.1              | <a href="https://phytozome-next.jgi.doe.gov/info/Ecoracana_v1_1">https://phytozome-next.jgi.doe.gov/info/Ecoracana_v1_1</a>            |
| <i>Hordeum vulgare</i>         | v1               | Beier et al., 2017                                                                                                                     |
| <i>Miscanthus sinensis</i>     | 7.1              | Mitros et al., 2020                                                                                                                    |
| <i>Oropetium thomaeum</i>      | 1.0              | VanBuren et al., 2015                                                                                                                  |
| <i>Oryza sativa</i>            | 7.0              | Ouyang et al., 2007                                                                                                                    |
| <i>Panicum hallii</i>          | 3.2              | Lovell et al., 2018                                                                                                                    |
| <i>Panicum hallii HAL</i>      | 2.2              | Lovell et al., 2018                                                                                                                    |
| <i>Panicum virgatum</i>        | 5.1              | Lovell et al., 2021                                                                                                                    |
| <i>Paspalum vaginatum</i>      | 3.1              | DOE-JGI, <a href="https://phytozome-next.jgi.doe.gov/info/Pvaginatum_v3_1">https://phytozome-next.jgi.doe.gov/info/Pvaginatum_v3_1</a> |
| <i>Setaria italica</i>         | 2.2              | Bennetzen et al., 2012                                                                                                                 |
| <i>Setaria viridis</i>         | 2.1              | Mamidi et al., 2020                                                                                                                    |
| <i>Sorghum bicolor</i>         | 3.1.1            | McCormick et al., 2018                                                                                                                 |
| <i>Sorghum bicolor Rio</i>     | 2.1              | Cooper et al., 2019                                                                                                                    |
| <i>Triticum aestivum</i>       | 2.2              | International Wheat Genome Sequencing Consortium (IWGSC), 2014                                                                         |
| <i>Urochloa fusca</i>          | 1.1              | DOE-JGI, <a href="https://phytozome-next.jgi.doe.gov/info/Ufusca_v1_1">https://phytozome-next.jgi.doe.gov/info/Ufusca_v1_1</a>         |
| <i>Zea mays</i>                | B73_v4           | Jiao et al., 2017                                                                                                                      |

- Beier, S., Himmelbach, A., Colmsee, C., Zhang, X.Q., Barrero, R.A., Zhang, Q., Li, L., Bayer, M., Bolser, D., Taudien, S., Groth, M., Felder, M., Hastie, A., Simkova, H., Stankova, H., Vrana, J., Chan, S., Munoz-Amatriain, M., Ounit, R., Wanamaker, S., Schmutzer, T., Aliyeva-Schnorr, L., Grasso, S., Tanskanen, J., Sampath, D., Heavens, D., Cao, S., Chapman, B., Dai, F., Han, Y., Li, H., Li, X., Lin, C., McCooke, J.K., Tan, C., Wang, S., Yin, S., Zhou, G., Poland, J.A., Bellgard, M.I., Houben, A., Dolezel, J., Ayling, S., Lonardi, S., Langridge, P., Muehlbauer, G.J., Kersey, P., Clark, M.D., Caccamo, M., Schulman, A.H., Platzer, M., Close, T.J., Hansson, M., Zhang, G., Braumann, I., Li, C., Waugh, R., Scholz, U., Stein, N., and Mascher, M. (2017). Construction of a map-based reference genome sequence for barley, *Hordeum vulgare* L. *Sci Data* **4**, 170044.
- Bennetzen, J.L., Schmutz, J., Wang, H., Percifield, R., Hawkins, J., Pontaroli, A.C., Estep, M., Feng, L., Vaughn, J.N., Grimwood, J., Jenkins, J., Barry, K., Lindquist, E., Hellsten, U., Deshpande, S., Wang, X., Wu, X., Mitros, T., Triplett, J., Yang, X., Ye, C.Y., Mauro-Herrera, M., Wang, L., Li, P., Sharma, M., Sharma, R., Ronald, P.C., Panaud, O., Kellogg, E.A., Brutnell, T.P., Doust, A.N., Tuskan, G.A., Rokhsar, D., and Devos, K.M. (2012). Reference genome sequence of the model plant *Setaria*. *Nat Biotechnol* **30**, 555-561.
- Cooper, E.A., Brenton, Z.W., Flinn, B.S., Jenkins, J., Shu, S., Flowers, D., Luo, F., Wang, Y., Xia, P., Barry, K., Daum, C., Lipzen, A., Yoshinaga, Y., Schmutz, J., Saski, C., Vermerris, W., and Kresovich, S. (2019). A new reference genome for *Sorghum bicolor* reveals high levels of sequence similarity between sweet and grain genotypes: implications for the genetics of sugar metabolism. *Bmc Genomics* **20**, 420.
- Gordon, S.P., Contreras-Moreira, B., Levy, J.J., Djamei, A., Czedik-Eysenberg, A., Tartaglio, V.S., Session, A., Martin, J., Cartwright, A., Katz, A., Singan, V.R., Goltsman, E., Barry, K., Dinh-Thi, V.H., Chalhoub, B., Diaz-Perez, A., Sancho, R., Lusinska, J., Wolny, E., Nibau, C., Doonan, J.H., Mur, L.A.J., Plott, C., Jenkins, J., Hazen, S.P., Lee, S.J., Shu, S., Goodstein, D., Rokhsar, D., Schmutz, J., Hasterok, R., Catalan, P., and Vogel, J.P. (2020). Gradual polyploid genome evolution revealed by pan-genomic analysis of *Brachypodium hybridum* and its diploid progenitors. *Nat Commun* **11**, 3670.
- IWGSC. (2014). A chromosome-based draft sequence of the hexaploid bread wheat (*Triticum aestivum*) genome. *Science* **345**, 1251788.
- Jiao, Y., Peluso, P., Shi, J., Liang, T., Stitzer, M.C., Wang, B., Campbell, M.S., Stein, J.C., Wei, X., Chin, C.S., Guill, K., Regulski, M., Kumari, S., Olson, A., Gent, J., Schneider, K.L., Wolfgruber, T.K., May, M.R., Springer, N.M., Antoniou, E., McCombie, W.R., Presting, G.G., McMullen, M., Ross-Ibarra, J., Dawe, R.K., Hastie, A., Rank, D.R., and Ware, D. (2017). Improved maize reference genome with single-molecule technologies. *Nature* **546**, 524-527.
- Lovell, J.T., Jenkins, J., Lowry, D.B., Mamidi, S., Sreedasyam, A., Weng, X., Barry, K., Bonnette, J., Campitelli, B., Daum, C., Gordon, S.P., Gould, B.A., Khasanova, A., Lipzen, A., MacQueen, A., Palacio-Mejia, J.D., Plott, C., Shakirov, E.V., Shu, S., Yoshinaga, Y., Zane, M., Kudrna, D., Talag, J.D., Rokhsar, D., Grimwood, J., Schmutz, J., and Juenger, T.E. (2018). The genomic landscape of molecular responses to natural drought stress in *Panicum hallii*. *Nat Commun* **9**, 5213.
- Lovell, J.T., MacQueen, A.H., Mamidi, S., Bonnette, J., Jenkins, J., Napier, J.D., Sreedasyam, A., Healey, A., Session, A., Shu, S., Barry, K., Bonos, S., Boston, L., Daum, C., Deshpande, S., Ewing, A., Grabowski, P.P., Haque, T., Harrison, M., Jiang, J., Kudrna, D., Lipzen, A., Pendergast, T.H.t., Plott, C., Qi, P., Saski, C.A., Shakirov, E.V., Sims, D., Sharma, M., Sharma, R., Stewart, A., Singan, V.R., Tang, Y., Thibivillier, S., Webber, J., Weng, X., Williams, M., Wu, G.A., Yoshinaga, Y., Zane, M., Zhang, L., Zhang, J., Behrman, K.D., Boe, A.R., Fay, P.A., Fritschi, F.B., Jastrow, J.D., Lloyd-Reilley, J., Martinez-Reyna, J.M., Matamala, R., Mitchell, R.B., Rouquette, F.M., Jr., Ronald, P., Saha, M., Tobias, C.M., Udvardi, M., Wing, R.A., Wu, Y., Bartley, L.E., Casler, M., Devos, K.M., Lowry, D.B., Rokhsar, D.S., Grimwood, J., Juenger, T.E., and Schmutz, J. (2021). Genomic mechanisms of climate adaptation in polyploid bioenergy switchgrass. *Nature* **590**, 438-444.



- Mamidi, S., Healey, A., Huang, P., Grimwood, J., Jenkins, J., Barry, K., Sreedasyam, A., Shu, S., Lovell, J.T., Feldman, M., Wu, J., Yu, Y., Chen, C., Johnson, J., Sakakibara, H., Kiba, T., Sakurai, T., Tavares, R., Nusinow, D.A., Baxter, I., Schmutz, J., Brutnell, T.P., and Kellogg, E.A.** (2020). A genome resource for green millet *Setaria viridis* enables discovery of agronomically valuable loci. *Nat Biotechnol* **38**, 1203-1210.
- McCormick, R.F., Truong, S.K., Sreedasyam, A., Jenkins, J., Shu, S., Sims, D., Kennedy, M., Amirebrahimi, M., Weers, B.D., McKinley, B., Mattison, A., Morishige, D.T., Grimwood, J., Schmutz, J., and Mullet, J.E.** (2018). The *Sorghum bicolor* reference genome: improved assembly, gene annotations, a transcriptome atlas, and signatures of genome organization. *Plant J* **93**, 338-354.
- Mitros, T., Session, A.M., James, B.T., Wu, G.A., Belaffif, M.B., Clark, L.V., Shu, S., Dong, H., Barling, A., Holmes, J.R., Mattick, J.E., Bredeson, J.V., Liu, S., Farrar, K., Glowacka, K., Jezowski, S., Barry, K., Chae, W.B., Juvik, J.A., Gifford, J., Oladeinde, A., Yamada, T., Grimwood, J., Putnam, N.H., De Vega, J., Barth, S., Klaas, M., Hodgkinson, T., Li, L., Jin, X., Peng, J., Yu, C.Y., Heo, K., Yoo, J.H., Ghimire, B.K., Donnison, I.S., Schmutz, J., Hudson, M.E., Sacks, E.J., Moose, S.P., Swaminathan, K., and Rokhsar, D.S.** (2020). Genome biology of the paleotetraploid perennial biomass crop *Miscanthus*. *Nat Commun* **11**, 5442.
- Ouyang, S., Zhu, W., Hamilton, J., Lin, H., Campbell, M., Childs, K., Thibaud-Nissen, F., Malek, R.L., Lee, Y., Zheng, L., Orvis, J., Haas, B., Wortman, J., and Buell, C.R.** (2007). The TIGR Rice Genome Annotation Resource: improvements and new features. *Nucleic Acids Res* **35**, D883-887.
- VanBuren, R., Bryant, D., Edger, P.P., Tang, H., Burgess, D., Challabathula, D., Spittle, K., Hall, R., Gu, J., Lyons, E., Freeling, M., Bartels, D., Ten Hallers, B., Hastie, A., Michael, T.P., and Mockler, T.C.** (2015). Single-molecule sequencing of the desiccation-tolerant grass *Oropetium thomaeum*. *Nature* **527**, 508-511.
