# Supplementary material for: Evolution of DIMBOA-Glc O-Methyltransferases from Flavonoid O-Methyltransferases in the Grasses
Source: MDPI journal article supplement (doi:10.3390/molecules27031007), 2022-02-02
Supplement: s1 [file s1]

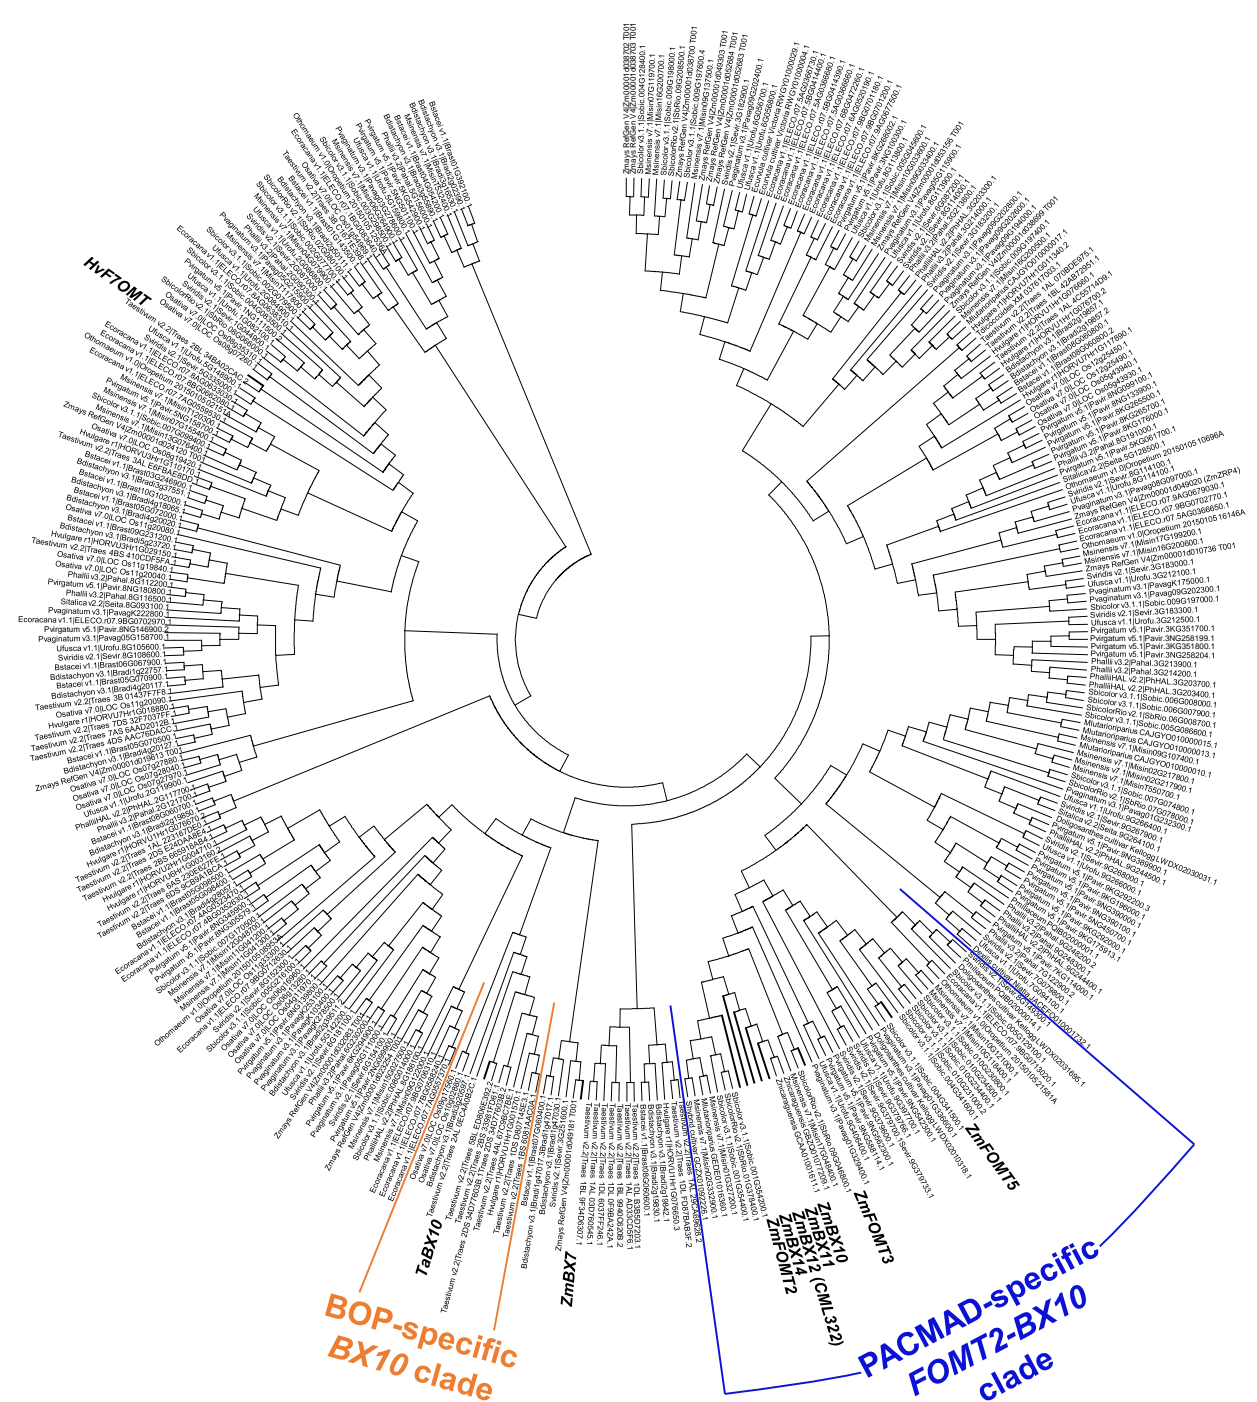

**Figure S1.** Phylogenetic tree of Poaceae OMT genes similar to *ZmFOMT2*. OMTs were identified by BLASTP analysis with *ZmFOMT2* as query and using Poaceae protein datasets available in the Phytozome 13 (<https://phytozome-next.jgi.doe.gov/>) and NCBI (<https://www.ncbi.nlm.nih.gov/>) databases. Additional sequences were obtained from the NCBI TSA database (<https://www.ncbi.nlm.nih.gov/genbank/tsa/>) by a local BLAST search using BioEdit followed by an NCBI search for full sequences. Only genes (ORFs) with  $\geq 80\%$  query coverage and a corresponding amino acid identity of  $\geq 40\%$  were included. The tree was inferred using the maximum likelihood method based on the General Time Reversible model, including gamma distributed rate variation among sites (+G, 1.8577). All positions with  $< 90\%$  site coverage were eliminated. OMTs previously characterized in the literature are highlighted in black bold, and the “PACMAD-specific *FOMT2-BX10* clade” and “BOP-specific *BX10* clade” are marked in blue and orange, respectively. Sequences of the following species were included in the tree: *Brachypodium distachyon*; *Brachypodium stacei*; *Dichanthelium oligosanthes* Kellogg; *Digitaria exilis* Niatia; *Eleusine coracana*; *Eragrostis curvula* Victoria; *Hordeum vulgare* (Hv); *Miscanthus lutarioriparius*; *Miscanthus sinensis*; *Oropetium thomaeum*; *Oryza sativa*; *Panicum hallii*; *Panicum hallii* HAL; *Panicum miliaceum*; *Panicum virgatum*; *Paspalum vaginatum*; *Saccharum hybrid*; *Setaria italica*; *Setaria viridis*; *Sorghum bicolor*; *Sorghum bicolor* Rio; *Triticum aestivum* (Ta); *Triticum dicoccoides*; *Urochloa fusca*; *Zea mays* (Zm); *Zea nicaraguensis*.

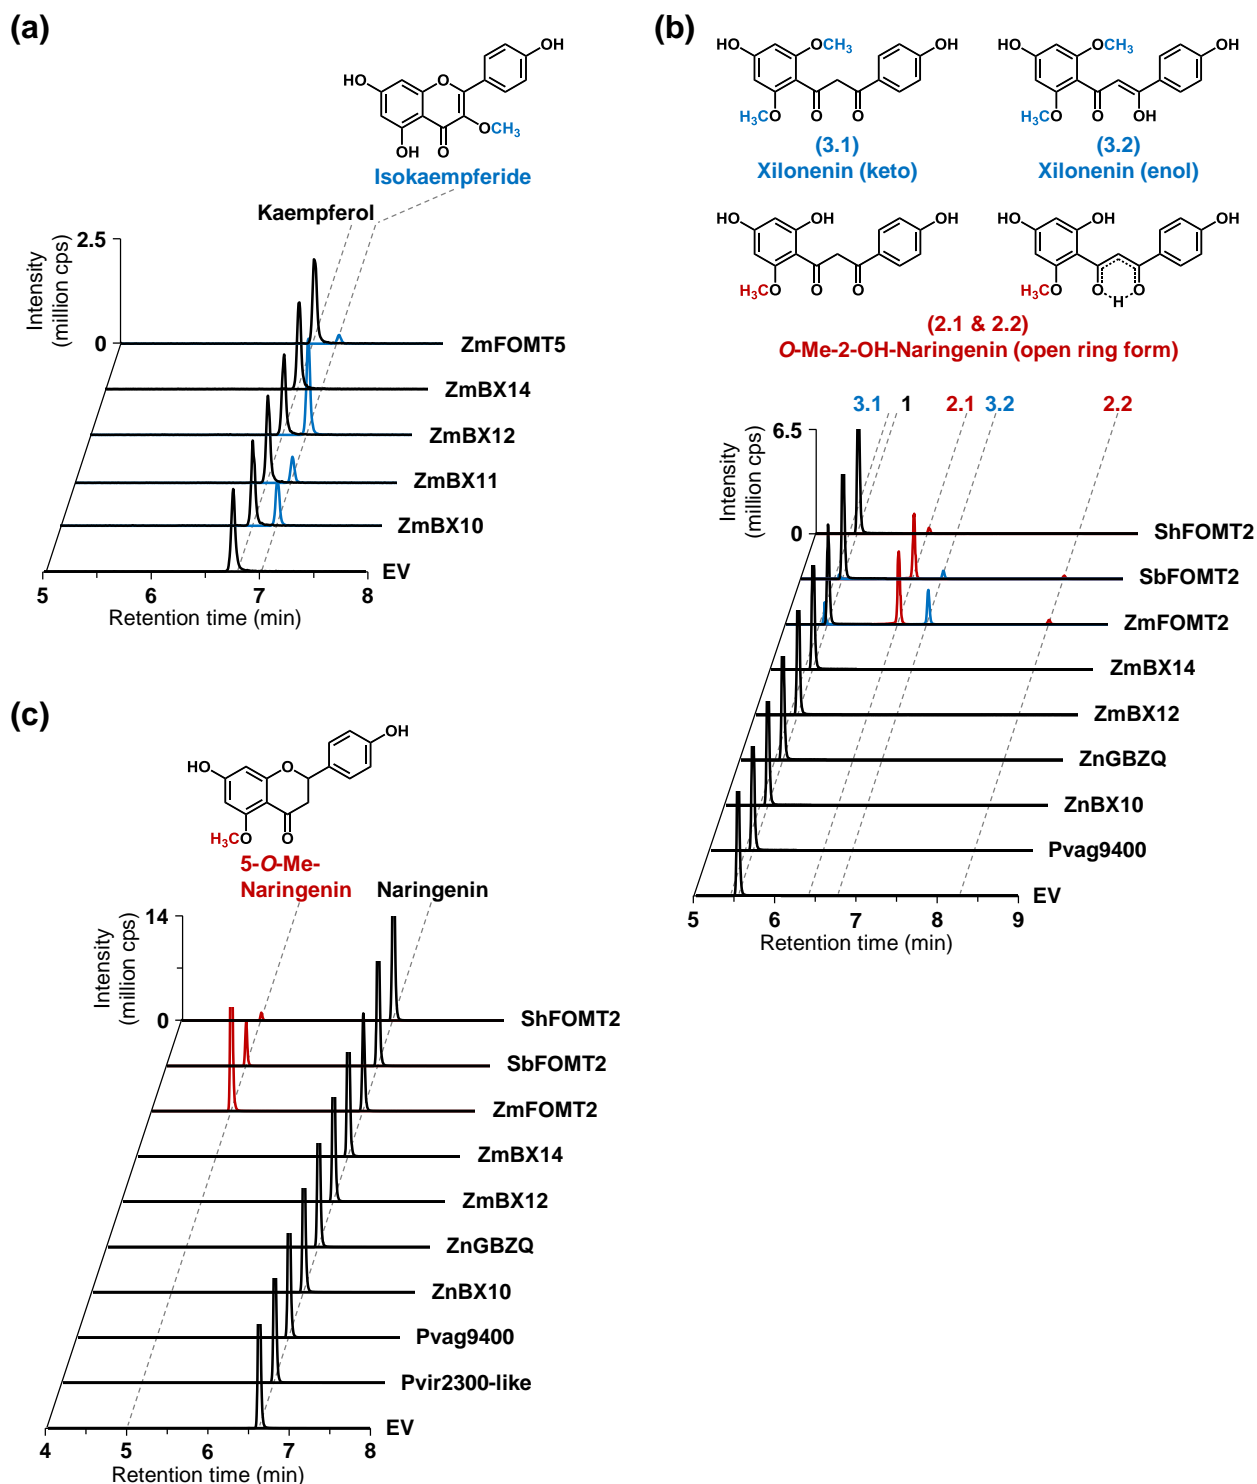

**Figure S2.** Enzymatic activity of *FOMT2*-like group members with different flavonoid substrates. The purified recombinant enzymes as well as an empty vector control (EV) were incubated with the potential substrates kaempferol (**a**), 2-hydroxynaringenin (**b**), and naringenin (**c**) in presence of the cosubstrate SAM. Reaction products were analyzed by LC-MS/MS. Chromatograms of specific MRM transitions (see methods section) are shown. The upper part of each panel shows the structures of the enzyme products, with the attached methyl groups highlighted in blue or red. All assays were performed in technical triplicates. Peak numbers in panel (b): 1, 2-hydroxynaringenin; 2.1 and 2.2, O-methyl-2-hydroxynaringenin; 3.1, xilonenin (keto); 3.2, xilonenin (enol). Abbreviations: Me, methyl; cps, counts per second. **Note:** The data shown in panel (a) were collected independently from the experiments shown in Figure 2 and panel (b) and (c).

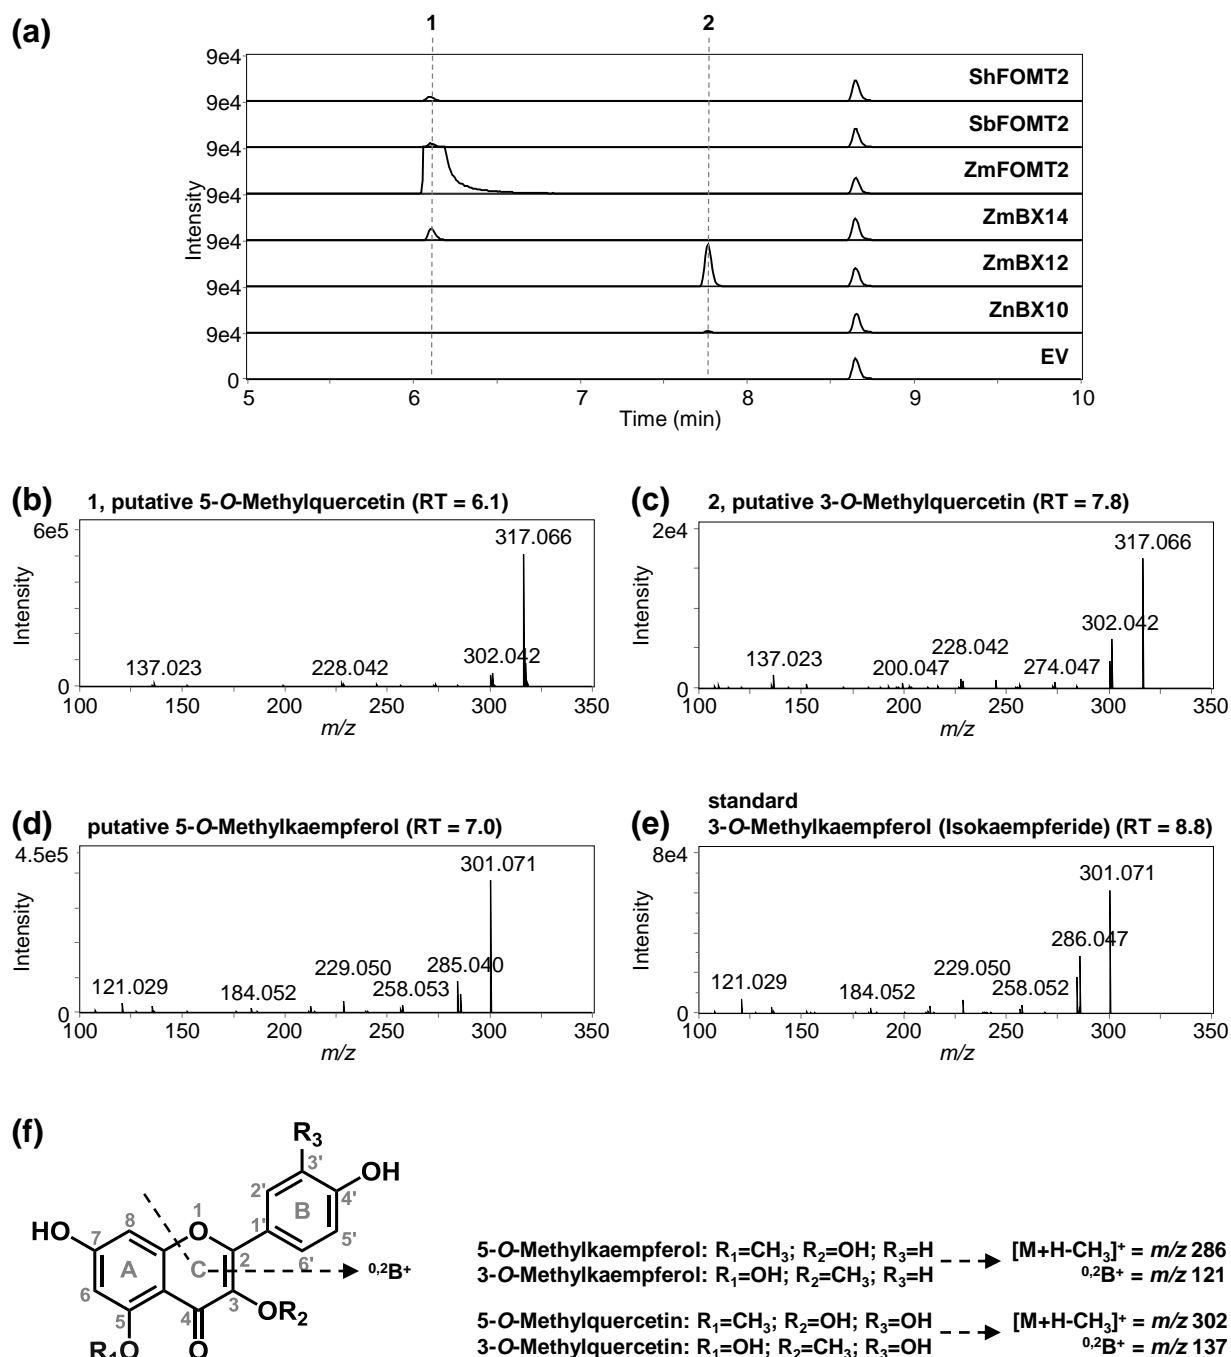

**Figure S3.** BX OMTs catalyze the 3-O-methylation of flavonols. Extracted ion chromatograms ( $m/z$  317.066  $[M+H]^+$ ) (a) and MS/MS spectra (b-c) of quercetin products produced by FOMT2-like FOMTs and BX OMTs. For comparison the MS/MS spectra of the corresponding kaempferol products putative 5-O-methylkaempferol and 3-O-methylkaempferol (isokaempferide) are shown (d-e). Fragmentation patterns are similar and consistent with mono-O-methylation on the flavonol A- or C-ring, as a typical B-ring fragment is observed (f). The position of O-methylation can be distinguished by retention time (RT). Enzyme assays using quercetin or kaempferol as substrate were analyzed using untargeted LC-MS (full scan and auto MS/MS mode) as described in the methods section. The MS/MS spectrum of isokaempferide was obtained using the purified compound. 1, putative 5-O-methylquercetin; 2, putative 3-O-methylquercetin.

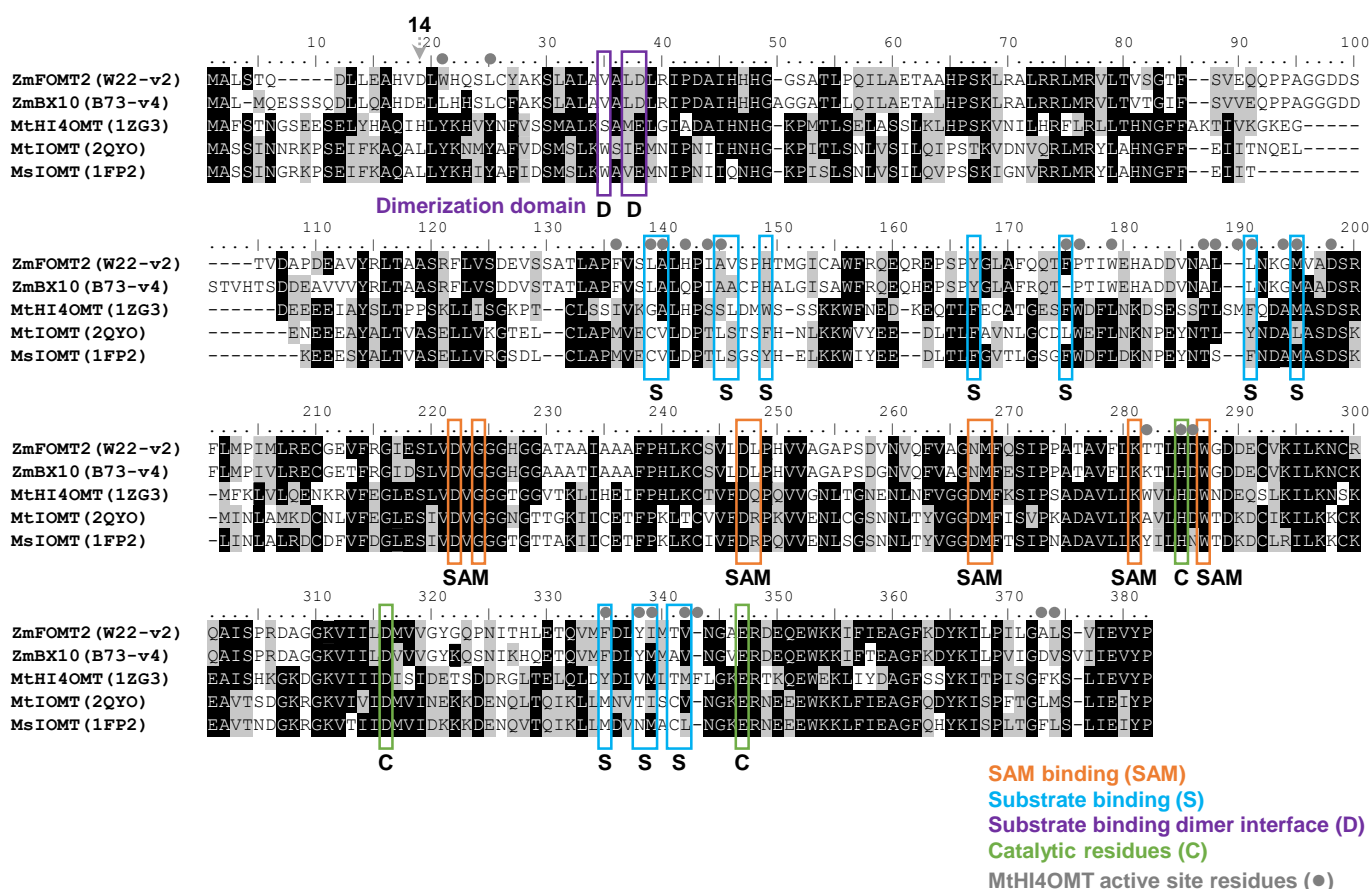

**Figure S4.** Amino acid sequence alignment of ZmFOMT2 and ZmBX10 with isoflavone OMTs. Isoflavone 4'-OMT from *Medicago truncatula* (MthI4OMT; PDB-ID: 1ZG3), Isoflavone-OMT from *M. truncatula* (MtiOMT; PDB-ID: 2QYO), and Isoflavone-OMT from *Medicago sativa* (MsiOMT; PDB-ID: 1FP2) were identified as the best templates for homology modelling with ZmFOMT2 (MZ484743) using the Swiss-Model server (<https://swissmodel.expasy.org/>). The sequences were aligned using MEGA7 and visualized with BioEdit. Identical amino acids are shaded in black and similar amino acids in grey. Amino acid residues involved in SAM binding (orange), substrate binding (blue), substrate binding from the second polypeptide chain of the homodimer (purple), catalysis (green) are highlighted (modified from Zubieta et al., 2001). MthI4OMT active site residues are marked with grey dots (modified from Liu et al., 2006). ZmFOMT2 shares 39%, 34%, 35%, and 84% amino acid identity with MthI4OMT, MtiOMT, MsiOMT, and ZmBX10, respectively. ZmBX10 is encoded by *Zm00001d029359*. **Note:** Unlike the MaizeGDB database sequence encoded by *Zm00004b033403/Zm00004b033399* (W22\_v2), the cloned ZmFOMT2 (MZ484743) sequence displayed here contains a D instead of an E in position 14 (grey dashed arrow).

10 20 30 40 50 60 70 80 90 100

Ms02G332900 -----MAL-VESS-----AYVELWHQSLOCYTKSMALAVALDLRIPDAIHHRG-GGATLEPOILAETALH-PN-KLRALRSLMRALT-VFGTFS-  
ShGCZX01092226 -----MAL-VEESS-----QDLLOAYVELWHQSLOCYTKSMALAVALDLRIPDAIHHRG-GGATLEPOILAETALH-PN-KLRALRSLMRALT-VFGTFS-  
Ms01G327200 -----MAL-VEESS-----QDLLOAYVELWHQSLOCYTKSMALAVALDLRIPDAIHHRG-GGATLEPOILAETALH-PN-KLRALRSLMRALT-VFGTFS-  
MlGEDE01016360 -----MAL-VEESS-----QDLLOAYVELWHQSLOCYTKSMALAVALDLRIPDAIHHRG-GGATLEPOILAETALH-PN-KLRALRSLMRALT-VFGTFS-  
Sb001G354400 -----MAP-AEESS-----QDLLOAYVELWHQSLOCYTKSMALAVALDLRIPDAIHHRG-GGATLEPOILAETALH-PN-KLRALRSLMRALT-VFGTFS-  
Sb001G354200 -----MAL-VOESS-----QDLLOAYVELWHQSLOCYTKSMALAVALDLRIPDAIHHRG-GGATLEPOILAETALH-PN-KLRALRSLMRALT-VFGTFS-  
SbRio01G378400 -----MAL-VOESS-----QDLLOAYVELWHQSLOCYTKSMALAVALDLRIPDAIHHRG-GGATLEPOILAETALH-PN-KLRALRSLMRALT-VFGTFS-  
ZmFOMT2 -----MAL-----ST-----QDLLEAHVELWHQSLOCYTKSMALAVALDLRIPDAIHHRG-GGATLEPOILAETALH-PS-KLRALRRLMRVLT-VSGTFS-  
ZmBX14 -----MAL-MOESS-----QDLLEAHDELHHCLOCYTKSMALAVALDLRIPDAIHHRG-GGATLEPOILAETALH-PS-KLRALRRLMRVLT-VSGTFS-  
ZmBX12 (CML322) -----MAL-MOESSSQ-----QDLLOAHDELHHCLOCYTKSMALAVALDLRIPDAIHHRG-GGATLEPOILAETALH-PS-KLRALRRLMRVLT-VSGTFS-  
ZmBX11 -----MAL-MOESS-----QDLLOAHDELHHCLOCYTKSMALAVALDLRIPDAIHHRG-GGATLEPOILAETALH-PS-KLRALRRLMRVLT-VSGTFS-  
ZmBX10 -----MAL-MOESS-----QDLLOAHDELHHCLOCYTKSMALAVALDLRIPDAIHHRG-GGATLEPOILAETALH-PS-KLRALRRLMRVLT-VSGTFS-  
ZnGBZQ01077209 -----MAL-MOESS-----QDLLOAHDELHHCLOCYTKSMALAVALDLRIPDAIHHRG-GGATLEPOILAETALH-PS-KLRALRRLMRVLT-VSGTFS-  
ZnGCAA01001611 -----MAL-MOESS-----QDLLOAHDELHHCLOCYTKSMALAVALDLRIPDAIHHRG-GGATLEPOILAETALH-PS-KLRALRRLMRVLT-VSGTFS-  
Ms17G048400 -----MAL-TETTESN-----QDLLOAHDELHHCLOCYTKSMALAVALDLRIPDAIHHRG-GGATLEPOILAETALH-PC-KLRALRRLMRVLT-VSGTFS-  
ZmFOMT3 -----MAP-TEESS-----QDLLOAHDELHHCLOCYTKSMALAVALDLRIPDAIHHRG-GGATLEPOILAETALH-PS-KLRALRRLMRVLT-VSGTFS-  
SbRio09G046800 -----MAL-TETTESN-----QDLLOAHDELHHCLOCYTKSMALAVALDLRIPDAIHHRG-GGATLEPOILAETALH-PC-KLRALRRLMRVLT-VSGTFS-  
Pvag01G329400 -----MAL-MEGRGQ-----QDLLOAHDELHHCLOCYTKSMALAVALDLRIPDAIHHRG-GGATLEPOILAETALH-PC-KLRALRRLMRVLT-VSGTFS-  
Uf9G406400 -----MAL-PVSSN-----QDLLOAHDELHHCLOCYTKSMALAVALDLRIPDAIHHRG-GGATLEPOILAETALH-PC-KLRALRRLMRVLT-VSGTFS-  
Pvir9NG588114 -----MAL-PVSSN-----QDLLOAHDELHHCLOCYTKSMALAVALDLRIPDAIHHRG-GGATLEPOILAETALH-PC-KLRALRRLMRVLT-VSGTFS-  
Pvir9NG562300 -----MAL-PVSSN-----QDLLOAHDELHHCLOCYTKSMALAVALDLRIPDAIHHRG-GGATLEPOILAETALH-PC-KLRALRRLMRVLT-VSGTFS-  
ZmFOMT5 -----MAL-LGVYSS-----QDLLOAHDELHHCLOCYTKSMALAVALDLRIPDAIHHRG-GGATLEPOILAETALH-PC-KLRALRRLMRVLT-VSGTFS-  
TaBX10 -----MPAAQHIERDQDLAMSSD-----QDLLOAHDELHHCLOCYTKSMALAVALDLRIPDAIHHRG-GGATLEPOILAETALH-PC-KLRALRRLMRVLT-VSGTFS-

Dimerization domain D D 119

110 120 130 140 150 160 170 180 190 200

Ms02G332900 -----V-CQPPPTSGDDP-----TVDSAGE-AV-YRLTAASRFLV-SDEV-SSA-TLAS-----FVSLALHPITAVAEHTLGMCAWFRQEQ-E-  
ShGCZX01092226 -----V-CQPPPTSGDDP-----TVDSAGE-AV-YRLTAASRFLV-SDEV-SSA-TLAS-----FVSLALHPITAVAEHTLGMCAWFRQEQ-E-  
Ms01G327200 -----V-CQPPPTSGDDP-----TVDSAGE-AV-YRLTAASRFLV-SDEV-SSA-TLAS-----FVSLALHPITAVAEHTLGMCAWFRQEQ-E-  
MlGEDE01016360 -----V-CQPPPTSGDDP-----TVDSAGE-AV-YRLTAASRFLV-SDEV-SSA-TLAS-----FVSLALHPITAVAEHTLGMCAWFRQEQ-E-  
Sb001G354400 -----V-CQPPPTSGDDP-----TVDSAGE-AV-YRLTAASRFLV-SDEV-SSA-TLAS-----FVSLALHPITAVAEHTLGMCAWFRQEQ-E-  
Sb001G354200 -----V-CQPPPTSGDDP-----TVDSAGE-AV-YRLTAASRFLV-SDEV-SSA-TLAS-----FVSLALHPITAVAEHTLGMCAWFRQEQ-E-  
SbRio01G378400 -----V-CQPPPTSGDDP-----TVDSAGE-AV-YRLTAASRFLV-SDEV-SSA-TLAS-----FVSLALHPITAVAEHTLGMCAWFRQEQ-E-  
ZmFOMT2 -----V-CQPPPTSGDDP-----TVDSAGE-AV-YRLTAASRFLV-SDEV-SSA-TLAS-----FVSLALHPITAVAEHTLGMCAWFRQEQ-E-  
ZmBX14 -----V-CQPPPTSGDDP-----TVDSAGE-AV-YRLTAASRFLV-SDEV-SSA-TLAS-----FVSLALHPITAVAEHTLGMCAWFRQEQ-E-  
ZmBX12 (CML322) -----V-CQPPPTSGDDP-----TVDSAGE-AV-YRLTAASRFLV-SDEV-SSA-TLAS-----FVSLALHPITAVAEHTLGMCAWFRQEQ-E-  
ZmBX11 -----V-CQPPPTSGDDP-----TVDSAGE-AV-YRLTAASRFLV-SDEV-SSA-TLAS-----FVSLALHPITAVAEHTLGMCAWFRQEQ-E-  
ZmBX10 -----V-CQPPPTSGDDP-----TVDSAGE-AV-YRLTAASRFLV-SDEV-SSA-TLAS-----FVSLALHPITAVAEHTLGMCAWFRQEQ-E-  
ZnGBZQ01077209 -----V-CQPPPTSGDDP-----TVDSAGE-AV-YRLTAASRFLV-SDEV-SSA-TLAS-----FVSLALHPITAVAEHTLGMCAWFRQEQ-E-  
ZnGCAA01001611 -----V-CQPPPTSGDDP-----TVDSAGE-AV-YRLTAASRFLV-SDEV-SSA-TLAS-----FVSLALHPITAVAEHTLGMCAWFRQEQ-E-  
Ms17G048400 -----V-CQPPPTSGDDP-----TVDSAGE-AV-YRLTAASRFLV-SDEV-SSA-TLAS-----FVSLALHPITAVAEHTLGMCAWFRQEQ-E-  
ZmFOMT3 -----V-CQPPPTSGDDP-----TVDSAGE-AV-YRLTAASRFLV-SDEV-SSA-TLAS-----FVSLALHPITAVAEHTLGMCAWFRQEQ-E-  
SbRio09G046800 -----V-CQPPPTSGDDP-----TVDSAGE-AV-YRLTAASRFLV-SDEV-SSA-TLAS-----FVSLALHPITAVAEHTLGMCAWFRQEQ-E-  
Pvag01G329400 -----V-CQPPPTSGDDP-----TVDSAGE-AV-YRLTAASRFLV-SDEV-SSA-TLAS-----FVSLALHPITAVAEHTLGMCAWFRQEQ-E-  
Uf9G406400 -----V-CQPPPTSGDDP-----TVDSAGE-AV-YRLTAASRFLV-SDEV-SSA-TLAS-----FVSLALHPITAVAEHTLGMCAWFRQEQ-E-  
Pvir9NG588114 -----V-CQPPPTSGDDP-----TVDSAGE-AV-YRLTAASRFLV-SDEV-SSA-TLAS-----FVSLALHPITAVAEHTLGMCAWFRQEQ-E-  
Pvir9NG562300 -----V-CQPPPTSGDDP-----TVDSAGE-AV-YRLTAASRFLV-SDEV-SSA-TLAS-----FVSLALHPITAVAEHTLGMCAWFRQEQ-E-  
ZmFOMT5 -----V-CQPPPTSGDDP-----TVDSAGE-AV-YRLTAASRFLV-SDEV-SSA-TLAS-----FVSLALHPITAVAEHTLGMCAWFRQEQ-E-  
TaBX10 -----V-CQPPPTSGDDP-----TVDSAGE-AV-YRLTAASRFLV-SDEV-SSA-TLAS-----FVSLALHPITAVAEHTLGMCAWFRQEQ-E-

210 220 230 240 250 260 270 280 290 300

Ms02G332900 -----PSP-YALAFROTTPTIWEHAD-----DVNAL-LNKGMVQDSRFLMPIV-LRECCE-VE-RGIDSINLVAGGGHGGATATAAAPHLKCSVID-  
ShGCZX01092226 -----PSP-YALAFROTTPTIWEHAD-----DVNAL-LNKGMVQDSRFLMPIV-LRECCE-VE-RGIDSINLVAGGGHGGATATAAAPHLKCSVID-  
Ms01G327200 -----PSP-YALAFROTTPTIWEHAD-----DVNAL-LNKGMVQDSRFLMPIV-LRECCE-VE-RGIDSINLVAGGGHGGATATAAAPHLKCSVID-  
MlGEDE01016360 -----PSP-YALAFROTTPTIWEHAD-----DVNAL-LNKGMVQDSRFLMPIV-LRECCE-VE-RGIDSINLVAGGGHGGATATAAAPHLKCSVID-  
Sb001G354400 -----PSP-YALAFROTTPTIWEHAD-----DVNAL-LNKGMVQDSRFLMPIV-LRECCE-VE-RGIDSINLVAGGGHGGATATAAAPHLKCSVID-  
Sb001G354200 -----PSP-YALAFROTTPTIWEHAD-----DVNAL-LNKGMVQDSRFLMPIV-LRECCE-VE-RGIDSINLVAGGGHGGATATAAAPHLKCSVID-  
SbRio01G378400 -----PSP-YALAFROTTPTIWEHAD-----DVNAL-LNKGMVQDSRFLMPIV-LRECCE-VE-RGIDSINLVAGGGHGGATATAAAPHLKCSVID-  
ZmFOMT2 -----PSP-YALAFROTTPTIWEHAD-----DVNAL-LNKGMVQDSRFLMPIV-LRECCE-VE-RGIDSINLVAGGGHGGATATAAAPHLKCSVID-  
ZmBX14 -----PSP-YALAFROTTPTIWEHAD-----DVNAL-LNKGMVQDSRFLMPIV-LRECCE-VE-RGIDSINLVAGGGHGGATATAAAPHLKCSVID-  
ZmBX12 (CML322) -----PSP-YALAFROTTPTIWEHAD-----DVNAL-LNKGMVQDSRFLMPIV-LRECCE-VE-RGIDSINLVAGGGHGGATATAAAPHLKCSVID-  
ZmBX11 -----PSP-YALAFROTTPTIWEHAD-----DVNAL-LNKGMVQDSRFLMPIV-LRECCE-VE-RGIDSINLVAGGGHGGATATAAAPHLKCSVID-  
ZmBX10 -----PSP-YALAFROTTPTIWEHAD-----DVNAL-LNKGMVQDSRFLMPIV-LRECCE-VE-RGIDSINLVAGGGHGGATATAAAPHLKCSVID-  
ZnGBZQ01077209 -----PSP-YALAFROTTPTIWEHAD-----DVNAL-LNKGMVQDSRFLMPIV-LRECCE-VE-RGIDSINLVAGGGHGGATATAAAPHLKCSVID-  
ZnGCAA01001611 -----PSP-YALAFROTTPTIWEHAD-----DVNAL-LNKGMVQDSRFLMPIV-LRECCE-VE-RGIDSINLVAGGGHGGATATAAAPHLKCSVID-  
Ms17G048400 -----PSP-YALAFROTTPTIWEHAD-----DVNAL-LNKGMVQDSRFLMPIV-LRECCE-VE-RGIDSINLVAGGGHGGATATAAAPHLKCSVID-  
ZmFOMT3 -----PSP-YALAFROTTPTIWEHAD-----DVNAL-LNKGMVQDSRFLMPIV-LRECCE-VE-RGIDSINLVAGGGHGGATATAAAPHLKCSVID-  
SbRio09G046800 -----PSP-YALAFROTTPTIWEHAD-----DVNAL-LNKGMVQDSRFLMPIV-LRECCE-VE-RGIDSINLVAGGGHGGATATAAAPHLKCSVID-  
Pvag01G329400 -----PSP-YALAFROTTPTIWEHAD-----DVNAL-LNKGMVQDSRFLMPIV-LRECCE-VE-RGIDSINLVAGGGHGGATATAAAPHLKCSVID-  
Uf9G406400 -----PSP-YALAFROTTPTIWEHAD-----DVNAL-LNKGMVQDSRFLMPIV-LRECCE-VE-RGIDSINLVAGGGHGGATATAAAPHLKCSVID-  
Pvir9NG588114 -----PSP-YALAFROTTPTIWEHAD-----DVNAL-LNKGMVQDSRFLMPIV-LRECCE-VE-RGIDSINLVAGGGHGGATATAAAPHLKCSVID-  
Pvir9NG562300 -----PSP-YALAFROTTPTIWEHAD-----DVNAL-LNKGMVQDSRFLMPIV-LRECCE-VE-RGIDSINLVAGGGHGGATATAAAPHLKCSVID-  
ZmFOMT5 -----PSP-YALAFROTTPTIWEHAD-----DVNAL-LNKGMVQDSRFLMPIV-LRECCE-VE-RGIDSINLVAGGGHGGATATAAAPHLKCSVID-  
TaBX10 -----PSP-YALAFROTTPTIWEHAD-----DVNAL-LNKGMVQDSRFLMPIV-LRECCE-VE-RGIDSINLVAGGGHGGATATAAAPHLKCSVID-



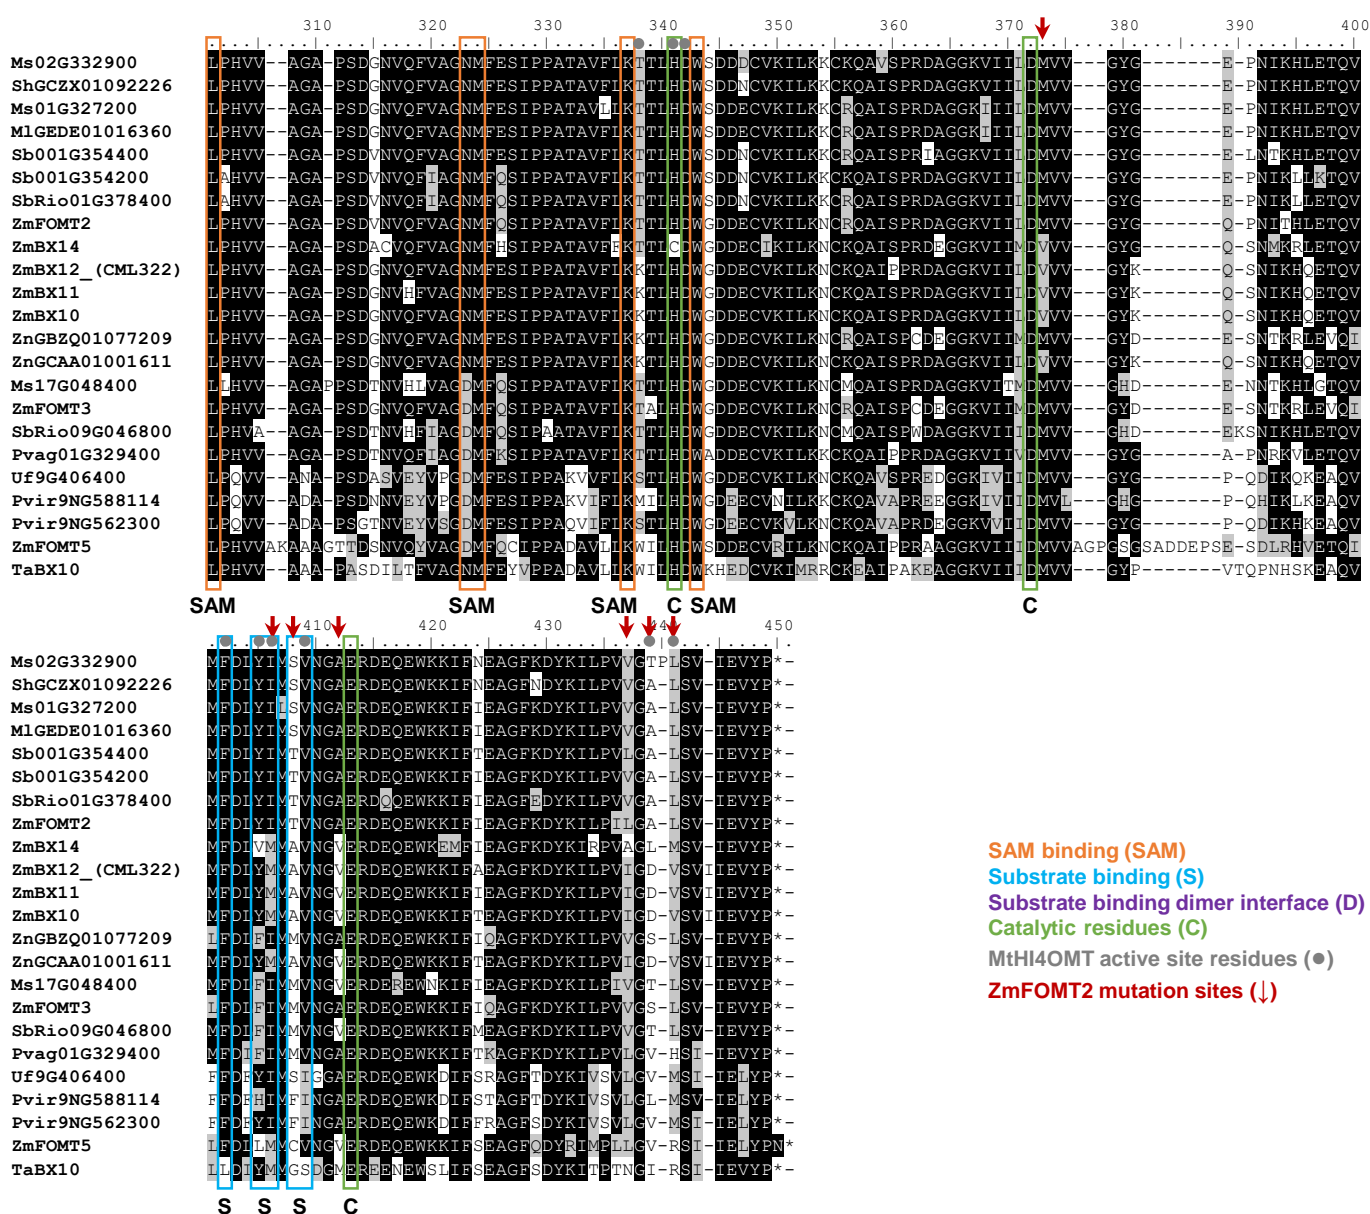

#### ***ShGCZX01092226* codon optimized**

ATGGCACTGGTTGAAGAAAGCAGCCAGGATCTGCTGCAGGCATATGTGAACTGTGGCATCAGAGCCTGTGTTATGCAAAAAGCATGGCCCTGGC  
AGTTGCACTGGATCTGCGTATTCCGGATGCAATTATCATCATCATGGTGGTGGTGCAACCCCTGCCTCAGATTCTGGCACAGACCGCACTGCATCCGA  
ATAAACTGCGTGCACTGCGTAGCCTGATGCGTATGCTGACCGTTTTTGGCACCTTTAGCGTTTCAGCAGCCTCCGACCAGCGGTGATGATAGCACC  
GTTGATGCAAGCGGTGAAGCAGTTTATCGTCTGACCGCAGCAAGCCGTTTTCTGGTGTAGTGATGAAGTAGCAGCGCAACCCCTGGCAAGCTTTGT  
TAGCCTGGCGCTGCATCAGATTGCCGTTGCACCGCATACCGTTGGTCTGTGTGCATGGTTTCGTCAAGAACAGAATGAACCGAGCGCATATGCAC  
TGGCATTTCGTGAGCCGACACCGACCATTTGGCAGCATGCAGATGATGTTAATGCACTGCTGAATAAAGGTATGGTTCAGGATAGTCGTTTTCTG  
CTGCCGATTGTTGTTTCGTGAATGTGGTGAAGTTTTTCGCGGTATTGATAGCCTGGTGTGATGTTGCCGGTGGTCATGGTGGCGCAAGCGCAATTAT  
TGCAGCAGCATTTCGCGATCTGAAATGTAGCGTTCTGGACCTGCCGATGTTGTTGCCGGTGCACCGAGTGATGGTAATGTTCAAGTTTGTGTCAG  
GTAACATGTTTGAAGCATCTCCGCTGCAACCGCAGTTTTCTGAAAACCACTGCATGATGTTGGTCCGATGATAACTGTGTGAAATCCTGAAA  
AAATGCAAGCAGGCAATTAGTCCGCGTGATGCAGGCGGTAAAGTTATTATTCTGGATATGGTGTGTTGGTTATGGCGAGCCGAACATTAAACATCT  
GAAAACCCAGGTTATGTTCCGACCTGTATATTATGAGCGTTAATGGTGAGAACGTCATGAACAAGAGTGGAAAAAATCTTTAACGAGGCAGGCT  
TCAACGACTACAAAATTCTGCCGGTTGTGGGTGCACTGAGCGTTATTGAAGTTTATCCGTAA

#### ***ZnGBZQ01077209* codon optimized**

ATGGCACTGATGCAAGAAAGCAGCAGCCAGGATCTGCTGCAGGCACATGATGAACTGCTGCATCATAGCCTGTGTTTTGCCAAAAGCCTGGCACT  
GGCAGTTGCACTGGATCTGCGTATTCCGGATGCAATTATCATCATCATGGTGGCGGTGGTGCAACCCCTGCTGCAAAATCTGGCAGAAACCGCACTGC  
ATCCGAGCAAACTGCGTGCACTGCGTCTGATGCGTGTTCTGACCGTTACCGGTATTTTTAGCGTTGAACAGCCTCCGGCAGGCGGTGGTGAT  
GATAGCACCCTTCATACCTCAGATGATGAAGCCGTTGTTTATCGTCTGACCGCAGCAAGCCGTTTTCTGGTGTAGTGATGATGTTAGCACAGCAAC  
CCTGGCACCGTTTTGTTAGCCTGGCGCTGCAGCCGATTGCAGCATGTCCGCATGCACCTGGGTATTAGCGCATGGTTTTCTGTCAGAACAGCATGAAC  
CGAGTCCGTATGGTCTGGCATTTCGTGAGACCCCGACCATTTGGGAACATGCAGATGATGTAATGCACTGCTGAATAAAGGTATGGCAGCAGAT  
AGTCGTTTTCTGATGCCGATTGTTCTGCGTGAATGTGGTGAATGTTTCTGGTATTGATAGCCTGGTGTGATGTTGGTGGTGGTCATGGTGGTGC  
AGCAGCAGCAATTGCAGCAGCCTTTCCGCATCTGAAATGTAGCGTTCTGGACCTGCCGCATGTTGTTGCCGGTGCACCGAGTGATGGTAATGTTT  
AGTTTGTGTCAGGCAACATGTTTGAAGCATTCCGCCCTGCAACCGCAGTTTTTCTGAAAAAAACCCCTGCATGATTGGGGTGATGATGAGTGTGTT  
AAAATTCTGAAGAATTGCCGTGAGGCAATTAGCCCGTGATGAAGGTGGTAAAGTGATTATTATGATATGGTGGTGGGTATGATGAGAGCAA  
TACCAACCGTCTGGAAGTGCAGATTCTGTTTGACCTGTTATTATGATGGTGAATGGTGCCGAACGTGATGAACAAGATGGAAAAAATCTTTA  
TCCAGGCAGGCTTCAAGACTATAAAATCCTGCCGGTTGTTGGTAGCCTGAGCGTTATTGAAGTTTATCCGTAA

#### ***ZnGCAA01001611* codon optimized**

ATGGCACTGATGCAAGAAAGCAGCAGCCAGGATCTGCTGCAGGCACATGATGAACTGCTGCATCATAGCCTGTGTTTTGCCAAAAGCCTGGCACT  
GGCAGTTGCACTGGATCTGCGTATTCCGGATGCAATTATCATCATCATGGTGGCGGTGGTGCAACCCCTGCTGCAAAATCTGGCAGAAACCGCACTGC  
ATCCGAGCAAACTGCGTGCACTGCGTCTGATGCGTGTTCTGACCGTTACCGGTATTTTTAGCGTTGAACAGCCTCCGGCAGGCGGTGGTGAT  
ATAGCACCGTTTATACCTCAGATGATGAAGCCGTTGTTTATCGTCTGACCGCAGCAAGCCGTTTTCTGGTGTAGTGATGATGTTAGCACAGCAAC  
CCTGGCACCGTTTTGTTAGCCTGGCGCTGCAGCCGATTGCAGCATGTCCGCATGCACCTGGGTATTAGCGCATGGTTTTCTGTCAGAACAGCATGAAC  
CGAGTCCGTATGGTCTGGCATTTCGTGAGACCCCGACCATTTGGGAACATGCAGATGATGTAATGCACTGCTGAATAAAGGTATGGCAGCAGAT  
AGTCGTTTTCTGATGCCGATTGTTCTGCGTGAATGTGGTGAATGTTTCTGGTATTGATAGCCTGGTGTGATGTTGGTGGTGGTCATGGTGGTGC  
AGCAGCAGCAATTGCAGCAGCCTTTCCGCATCTGAAATGTAGCGTTCTGGACCTGCCGCATGTTGTTGCCGGTGCACCGAGTGATGGTAATGTTT  
AGTTTGTGTCAGGCAACATGTTTGAAGCATTCCGCCCTGCAACCGCAGTTTTTCTGAAAAAAACCCCTGCATGATTGGGGTGATGATGAGTGTGTT  
AAAATTCTGAAGAATTGCAAGCAGGCAATTAGTCCGCGTGATGCAGGCGGTAAAGTTATTATTCTGGATGTTGTTGTGGGCTACAAACAGAGCAA  
CATCAACATCAAGAAACCCAGGTTATGTTTCGACCTGTATATGATGGCAGTTAATGGTGTGAAACGTGATGAACAAGAGTGGAAAAAATCTTTA  
CCGAGGCAGGCTTCAAAGACTATAAAATCCTGCCGGTTATTGGTGATGTGAGCGTTATTATTGAAGTGTACCCGTAA

#### ***Pavag01G329400* codon optimized**

ATGATGGAAGAAGGTGCTGAGCAGCAGGATATGCTGCAGGCCTATATTGAACATTGGCATCAGAGCCTGAGCTATGTTAAAAGTCTGACCCCTGGC  
AGTTGCACTGGATCTGCGTATTCCGGATGCAATTATCATCATCATGGTGGTGCAGCAACCGCACCGCAGATTCTGGCAAAAGCAGGTCTGCATCCGT  
GTAAACTGCCTGCACTGCGTCTGATGCGTGTTCTGACCGCAGTTACCGGCACCTTTACCACCGTTTCAGCACCAGCAGCAGCCGGATGATGAA  
AGCGACGATGAAGCAGTGATAAACTGACAGCAGTTAGCCGTTTTCTGGTGAGTGATGATGACGATGCAGGTAGCAGCGCAAGCGCAACCACT  
GGCACCGTTGTTTACAGTTCAGCTGCATCTGATTAATGTTAGCCCGTATGCAAAAGGTCTGTGTGCATGGTTTCGTCAAGAACAGAATCATCCGA  
GCACCGATTGTCTGGCCCTGCGTCATGATGAAACCGTTTGGGAACGTCGGGATCATTTTAAATGCAATGCTGAATAAAGGCATGGAAGCGATAGT  
CGTTTTCTGATGTCTGTTGCACTGAGCCTGGAAGAATTTCTGGTGTGTTTTTCAAGGTATTGATAGCCTGGTGTGATGTTGGTGGTGGTTTTGGTGG  
TGCCGCAGCAGCAATTGCAGCAGCATTTCGCGATCTGAAATGTAGCGTTCTGGACCTGCCGCATGTTGTTGCCGGTGCACCGAGCGATACCAATG  
TGCAGTTTATTGCCGGTGATATGTTTAAAAGCATTCCGCCCTGCAACCGCAGTTTTTCTGAAAACAACCCCTGCATGATTGGGCAGATGATGAGTGT  
GTGAAAATTCTGAAAAAGTGCAAAACAGGCAATTCCGCCCTCGTGATGCAGGCGGTAAAGTTATTATTGTTGATATGGTGGTGGTTATGGCGCACC  
GAATCGTAAAGTTCTGGAACCCAGGTTATGTTTCGATATCTTTATCATGATGGTGAATGGTGCCGAACGTGATGAACAAGATGGAAGAAAAATCT  
TTACCAAGGCAGGCTTCAAAGACTATAAAATCCTGCCGGTTCTGGGTGTGCATAGCATTATTGAAGTTTATCCGTAA

**Figure S6.** Codon-optimized gene sequences of Poaceae OMTs synthesized for expression in *E. coli*.
